# Supplementary material
Source: HighWire-hosted journal article supplement (http://bmjopenquality.bmj.com/highwire/filestream/147018/field_highwire_adjunct_files/1/bmjoq-2023-002522supp002_data_supplement.pdf)
Supplement: bmjoq-2023-002522supp002_data_supplement.pdf [file bmjoq-2023-002522supp002_data_supplement.pdf]

## Appendix II. Expanded Tables Displaying the Extracted Data

Table 1. QI project characteristics (expanded)

| Authors               | Country        | How QI is documented                                 | Setting                                                                                           | Problem                                                                  | Scope  | Improvement Framework | QI Objective                                                                                            | Change Strategies                                                                                                                                                                                                                                 | Observed Change                                                                                                                                                                                                                                                                          | Decision-Makers Involved                                                                                                                                                                         |
|-----------------------|----------------|------------------------------------------------------|---------------------------------------------------------------------------------------------------|--------------------------------------------------------------------------|--------|-----------------------|---------------------------------------------------------------------------------------------------------|---------------------------------------------------------------------------------------------------------------------------------------------------------------------------------------------------------------------------------------------------|------------------------------------------------------------------------------------------------------------------------------------------------------------------------------------------------------------------------------------------------------------------------------------------|--------------------------------------------------------------------------------------------------------------------------------------------------------------------------------------------------|
| Arbour et al. 2021    | United States  | Retrospective description of QI program and outcomes | Primary care (5)                                                                                  | Maternal depression, intimate partner violence (IPV), and social needs   | Multi  | PDSA cycles           | In five sites, 75% of infants and their families will receive all recommended well-child visits on time | DULCE (Developmental Understanding and Legal Collaboration for Everyone):<br><ul style="list-style-type: none"> <li>Linking families with infants to needed resources</li> </ul>                                                                  | <ul style="list-style-type: none"> <li>High proportion of families screened for health-related social needs</li> <li>High proportion of families provided information about resources</li> <li>Increase in the percentage of families who completed well-child visits on time</li> </ul> | Regional:<br><ul style="list-style-type: none"> <li>Not specified</li> </ul> Local:<br><ul style="list-style-type: none"> <li>Clinic administrator</li> </ul>                                    |
| Brush et al. 2006     | United States  | Retrospective description of QI program and outcomes | Hospital (1)                                                                                      | Suboptimal cardiac surgery outcomes                                      | Single | None described        | Improve cardiac surgery outcomes through practice standardization                                       | <ul style="list-style-type: none"> <li>Data for percutaneous coronary intervention and cardiac surgery are collected</li> <li>Performance reports are reviewed and methods for improving performance are implemented</li> </ul>                   | <ul style="list-style-type: none"> <li>Improvements in several cardiac surgery indicators</li> </ul>                                                                                                                                                                                     | Local:<br><ul style="list-style-type: none"> <li>Administrators</li> </ul>                                                                                                                       |
| Chowdhury et al. 2020 | United Kingdom | Retrospective description of QI program and outcomes | Specialized (1)<br><ul style="list-style-type: none"> <li>Community mental health team</li> </ul> | Service users or their carers feel they are not given enough information | Single | PDSA cycles           | Improve communication between mental health team and service users, families, and carers                | <ul style="list-style-type: none"> <li>Medication leaflets for clinicians,</li> <li>Diagnostic leaflets for clinicians</li> <li>Amendment of clinician letters</li> <li>Mandatory diary updating</li> <li>Structured information entry</li> </ul> | <ul style="list-style-type: none"> <li>Increase in service user satisfaction</li> <li>Reduction in complaints</li> </ul>                                                                                                                                                                 | Local:<br><ul style="list-style-type: none"> <li>Team manager</li> <li>Deputy manager</li> <li>Team administrative manager</li> </ul>                                                            |
| Davies et al. 2019    | Ireland        | Retrospective description of QI program and outcomes | Hospital (1)                                                                                      | Inefficiencies in nursing care and suboptimal work conditions            | Single | Lean Six Sigma (LSS)  | Optimize nursing time and improve personalized care and staff satisfaction                              | <ul style="list-style-type: none"> <li>Streamlining documentation</li> <li>Visual indicator for refreshment needs,</li> <li>Increasing patient capacity</li> <li>Team-building</li> </ul>                                                         | <ul style="list-style-type: none"> <li>Service performance</li> <li>Patient satisfaction</li> <li>Staff satisfaction.</li> <li>Reduction in patient turnaround time</li> <li>Increase in nursing care time</li> <li>Improvement of nurse-patient ratio</li> </ul>                        | Local:<br><ul style="list-style-type: none"> <li>Hospital CEO</li> <li>Director of Nursing</li> </ul>                                                                                            |
| Doherty et al. 2009   | South Africa   | Retrospective description of QI program and outcomes | Multiple institutions in one district                                                             | High rates of mother-to-child HIV transmission                           | Multi  | None described        | Scale up program to prevent mother-to-child HIV transmission                                            | PMTCT (prevent mother-to-child transmission) programme:<br><ul style="list-style-type: none"> <li>Routine offer of antenatal counselling and testing</li> <li>Infant feeding counselling</li> <li>Nevirapine for mothers and infants</li> </ul>   | <ul style="list-style-type: none"> <li>Increase in rate of antenatal and PCR testing</li> <li>Uptake of infant nevirapine</li> </ul>                                                                                                                                                     | Regional:<br><ul style="list-style-type: none"> <li>District programme managers</li> </ul> Local:<br><ul style="list-style-type: none"> <li>Unit managers</li> <li>Clinic supervisors</li> </ul> |

|                            |                |                                                                                                 |                                                                                                                                                |                                                                          |        |                                                                                                                                                                   |                                                                                                    |                                                                                                                                                                                                                                                                                                                                                                                                                       |                                                                                                                                                                                                                                 |                                                                                                                                                                                                                          |
|----------------------------|----------------|-------------------------------------------------------------------------------------------------|------------------------------------------------------------------------------------------------------------------------------------------------|--------------------------------------------------------------------------|--------|-------------------------------------------------------------------------------------------------------------------------------------------------------------------|----------------------------------------------------------------------------------------------------|-----------------------------------------------------------------------------------------------------------------------------------------------------------------------------------------------------------------------------------------------------------------------------------------------------------------------------------------------------------------------------------------------------------------------|---------------------------------------------------------------------------------------------------------------------------------------------------------------------------------------------------------------------------------|--------------------------------------------------------------------------------------------------------------------------------------------------------------------------------------------------------------------------|
|                            |                |                                                                                                 |                                                                                                                                                |                                                                          |        |                                                                                                                                                                   |                                                                                                    | <ul style="list-style-type: none"> <li>• Infant PCR testing</li> <li>• Free formula for women choosing not to breastfeed</li> </ul>                                                                                                                                                                                                                                                                                   |                                                                                                                                                                                                                                 |                                                                                                                                                                                                                          |
| <b>Gage et al. 2022</b>    | Zimbabwe       | Retrospective description of QI program and outcomes and factors associated with implementation | Multiple institutions (30) in 5 districts <ul style="list-style-type: none"> <li>• Primary care</li> <li>• Hospitals</li> </ul>                | Suboptimal maternal, newborn and child health services                   | Multi  | PDSA cycles                                                                                                                                                       | Improve the quality of maternal, newborn, and child health services                                | Capacity building to conduct QI                                                                                                                                                                                                                                                                                                                                                                                       | <ul style="list-style-type: none"> <li>• Improvement in postnatal care process measures</li> <li>• Improvement in maternal care process measures</li> </ul>                                                                     | Regional: <ul style="list-style-type: none"> <li>• District managers</li> <li>• Ministry of Health and Child Care</li> </ul> Local: <ul style="list-style-type: none"> <li>• Managers</li> </ul>                         |
| <b>Gerrish et al. 2018</b> | United Kingdom | Retrospective description of QI program and outcomes and factors associated with implementation | Multiple institutions <ul style="list-style-type: none"> <li>• Primary care</li> <li>• Hospitals</li> <li>• Other service providers</li> </ul> | Risk of falls among elderly population and fall-related injury           | Multi  | Clinical micro-systems approach                                                                                                                                   | Improve quality of care within the falls pathway                                                   | Integrated care pathway for falls: <ul style="list-style-type: none"> <li>• Screening</li> <li>• Risk assessment</li> <li>• Multidisciplinary diagnosis of unexplained falls</li> </ul> <ul style="list-style-type: none"> <li>• Patient information</li> <li>• Enhanced data collection</li> <li>• Improved staff communication, coordination and role clarification</li> <li>• Referral process redesign</li> </ul> | <ul style="list-style-type: none"> <li>• Optimization of various aspects of the pathway</li> <li>• Collaboration between frontline staff and decision-makers from different services within the pathway was achieved</li> </ul> | Regional: <ul style="list-style-type: none"> <li>• Not specified</li> </ul> Local: <ul style="list-style-type: none"> <li>• Clinical managers</li> <li>• Senior clinical managers</li> <li>• Service managers</li> </ul> |
| <b>Haraden et al. 2011</b> | Scotland       | Description of QI program and intermediate outcomes                                             | Hospital (9)                                                                                                                                   | High rate of surgical mortality                                          | Multi  | Model for Improvement (PDSA cycles)                                                                                                                               | Improve care quality (person-centered, safe and effective) for acute care patients                 | Capacity building to conduct QI                                                                                                                                                                                                                                                                                                                                                                                       | <ul style="list-style-type: none"> <li>• Decrease in mortality rate</li> </ul>                                                                                                                                                  | Regional: <ul style="list-style-type: none"> <li>• Clinical managers</li> <li>• Local health boards</li> <li>• Government</li> </ul> Local: <ul style="list-style-type: none"> <li>• Managers</li> </ul>                 |
| <b>Hill et al. 2015</b>    | United States  | Retrospective description of QI program and outcomes                                            | Hospital (1)                                                                                                                                   | High rate of staff injury on inpatient child/adolescent psychiatric unit | Single | <ul style="list-style-type: none"> <li>• Intermediate Improvement Science Series (I2S2)</li> <li>• System of profound knowledge</li> <li>• PDSA cycles</li> </ul> | Reduce staff injury related to patient interactions in inpatient child/adolescent psychiatric unit | <ul style="list-style-type: none"> <li>• Precautionary measures</li> <li>• Standardized assessment</li> <li>• Protective equipment</li> <li>• Team huddles</li> <li>• Leadership rounds</li> <li>• Incident reviews</li> <li>• Safe handoff</li> <li>• Patient information binders</li> <li>• Patient identification board</li> </ul>                                                                                 | <ul style="list-style-type: none"> <li>• Reduction in injuries</li> </ul>                                                                                                                                                       | Local: <ul style="list-style-type: none"> <li>• Nursing director</li> </ul>                                                                                                                                              |
| <b>Iyengar et al. 2014</b> | India          | Retrospective description of QI program and outcomes                                            | Multiple institutions in 10 districts <ul style="list-style-type: none"> <li>• Public health facilities (44)</li> </ul>                        | Gaps in the quality of childbirth services for institutional deliveries  | Multi  | None described                                                                                                                                                    | Improve quality of childbirth services public service facilities                                   | <ul style="list-style-type: none"> <li>• Capacity building to conduct QI</li> <li>• Evidence based practice recommendations</li> </ul>                                                                                                                                                                                                                                                                                | <ul style="list-style-type: none"> <li>• Reduction of unnecessary or harmful practices during labor, delivery and postpartum (in most facilities)</li> </ul>                                                                    | Regional: <ul style="list-style-type: none"> <li>• State government</li> <li>• District health officers and State Managers</li> </ul>                                                                                    |

|                              |               |                                                                                                 |                                                                                                                                           |                                                                          |       |                                                                                                                |                                                                                                  |                                                                                                                                                                                                                                                           |                                                                                                                                                                                                         |                                                                                                                                                                                                                                                                             |
|------------------------------|---------------|-------------------------------------------------------------------------------------------------|-------------------------------------------------------------------------------------------------------------------------------------------|--------------------------------------------------------------------------|-------|----------------------------------------------------------------------------------------------------------------|--------------------------------------------------------------------------------------------------|-----------------------------------------------------------------------------------------------------------------------------------------------------------------------------------------------------------------------------------------------------------|---------------------------------------------------------------------------------------------------------------------------------------------------------------------------------------------------------|-----------------------------------------------------------------------------------------------------------------------------------------------------------------------------------------------------------------------------------------------------------------------------|
|                              |               |                                                                                                 |                                                                                                                                           |                                                                          |       |                                                                                                                |                                                                                                  | <ul style="list-style-type: none"> <li>• Staff received training</li> </ul>                                                                                                                                                                               |                                                                                                                                                                                                         | Local: <ul style="list-style-type: none"> <li>• Not specified</li> </ul>                                                                                                                                                                                                    |
| <b>Jaribu et al. 2015</b>    | Tanzania      | Retrospective description of QI program and outcomes                                            | Multiple institutions (27) in 2 regions <ul style="list-style-type: none"> <li>• Health centres</li> <li>• Dispensaries</li> </ul>        | Elevated maternal and neonatal morbidity and mortality                   | Multi | <ul style="list-style-type: none"> <li>• Breakthrough series collaborative</li> <li>• (PDSA cycles)</li> </ul> | Increase the rate of facility-based deliveries and improve the quality of perinatal care         | <ul style="list-style-type: none"> <li>• Improved monitoring and detection of problems at childbirth</li> <li>• Counselling of pregnant women</li> </ul>                                                                                                  | <ul style="list-style-type: none"> <li>• Increase in facility-based deliveries</li> <li>• Increase in number of partographs to monitor labor progress</li> </ul>                                        | Regional: <ul style="list-style-type: none"> <li>• District managers</li> </ul> Local: <ul style="list-style-type: none"> <li>• Not specified</li> </ul>                                                                                                                    |
| <b>Magge et al. 2019</b>     | Ethiopia      | Description of QI program and intermediate outcomes and QI implementation measures              | Multiple institutions in four regions within in one district <ul style="list-style-type: none"> <li>• Public health facilities</li> </ul> | Elevated rate of maternal and infant mortality                           | Multi | PDSA cycles                                                                                                    | Improve maternal and child health and reduce maternal and infant mortality                       | <ul style="list-style-type: none"> <li>• National quality strategy</li> <li>• QI collaborative infrastructure</li> <li>• Capacity building to conduct maternal and newborn health QI</li> </ul>                                                           | <ul style="list-style-type: none"> <li>• Numerous maternal and newborn health change ideas were tested</li> <li>• A change package was developed with 83 successfully tested change ideas</li> </ul>    | Regional: <ul style="list-style-type: none"> <li>• Federal Ministry of Health</li> <li>• Regional Health Bureaus</li> </ul> Local: <ul style="list-style-type: none"> <li>• Facility managers</li> </ul>                                                                    |
| <b>Mahomed et al. 2017</b>   | South Africa  | Retrospective description of QI program and outcomes and factors associated with implementation | Hospital (8) <ul style="list-style-type: none"> <li>• Intensive Care Units</li> </ul>                                                     | High rate of healthcare associated infections                            | Multi | PDSA cycles                                                                                                    | Implement a paper-based surveillance system for ICUs to measure healthcare-associated infections | Surveillance system for monitoring and preventing healthcare-associated infections in ICUs                                                                                                                                                                | <ul style="list-style-type: none"> <li>• Surveillance system implementation faced numerous challenges and was not successfully achieved</li> </ul>                                                      | Regional: <ul style="list-style-type: none"> <li>• Department of Health Provincial Infection Prevention and Control Unit</li> </ul> Local: <ul style="list-style-type: none"> <li>• Senior management</li> <li>• ICU nursing manager</li> <li>• Clinical manager</li> </ul> |
| <b>Mate et al. 2013</b>      | South Africa  | Retrospective description of QI program and outcomes                                            | Multiple institutions (161) in 18 health districts <ul style="list-style-type: none"> <li>• Health care facilities</li> </ul>             | High rate of mother-to-child HIV transmission                            | Multi | Model for improvement (PDSA cycles)                                                                            | Improve the quality of antenatal care and prevent mother-to-child HIV transmission               | A-Plan (Accelerated plan): <ul style="list-style-type: none"> <li>• Increase the number of pregnant women in antenatal care</li> <li>• Strengthen preventative services at health-care facilities</li> </ul>                                              | <ul style="list-style-type: none"> <li>• Tracking of processes in the prevent mother-to-child transmission program was established</li> </ul>                                                           | Regional: <ul style="list-style-type: none"> <li>• National Department of Health</li> <li>• District managers</li> </ul> Local: <ul style="list-style-type: none"> <li>• Facility managers</li> </ul>                                                                       |
| <b>Meehan et al. 2015</b>    | United States | Retrospective description of QI program and outcomes and factors associated with implementation | Specialized facilities (5) <ul style="list-style-type: none"> <li>• Skilled nursing facilities</li> </ul>                                 | High rate of hospital readmissions within 30 days post-discharge         | Multi | None described                                                                                                 | Decrease the rate of avoidable hospital readmissions                                             | INTERACT (Interventions to Reduce Acute Care Transfer): <ul style="list-style-type: none"> <li>• Improve identification, evaluation, and management of acute changes in residents' conditions</li> <li>• Implement tools to support these aims</li> </ul> | <ul style="list-style-type: none"> <li>• INTERACT tools implemented in all facilities</li> <li>• Hospital readmission rates decreased in two facilities</li> </ul>                                      | Regional: <ul style="list-style-type: none"> <li>• Not specified</li> </ul> Local: <ul style="list-style-type: none"> <li>• SNF Administrator</li> <li>• Director of Nursing</li> </ul>                                                                                     |
| <b>Needleman et al. 2016</b> | United States | Retrospective description of QI program and QI implementation measures                          | Hospital (67)                                                                                                                             | Suboptimal safety, reliability and patient-centredness of inpatient care | Multi | PDSA cycles                                                                                                    | Improve quality and efficiency of inpatient care and support more effective teamwork             | <ul style="list-style-type: none"> <li>• QI collaborative infrastructure</li> <li>• QI capacity building</li> </ul>                                                                                                                                       | <ul style="list-style-type: none"> <li>• Aspects of the QI project implemented in all participating hospitals</li> <li>• A large proportion of teams succeeded in conducting tests of change</li> </ul> | Local: <ul style="list-style-type: none"> <li>• Unit managers</li> <li>• Nursing administrators</li> <li>• Physician administrators</li> <li>• Department heads</li> </ul>                                                                                                  |
| <b>Nyström et al. 2018</b>   | Sweden        | Retrospective description of QI program and QI implementation measures                          | Specialized facilities in two municipalities <ul style="list-style-type: none"> <li>• Specialized care residences</li> </ul>              | Suboptimal elder care and care for children with functional impairments  | Multi | SIDSSA (development and action-learning loops)                                                                 | Improve care knowledge and capabilities of service providers                                     | <ul style="list-style-type: none"> <li>• Multi-level QI capacity building strategy</li> </ul>                                                                                                                                                             | <ul style="list-style-type: none"> <li>• Aspects of the QI intervention implemented in the participating settings</li> <li>• Participants' perceptions of the approach were favorable</li> </ul>        | Regional: <ul style="list-style-type: none"> <li>• Division managers</li> </ul> Local: <ul style="list-style-type: none"> <li>• Unit managers</li> </ul>                                                                                                                    |

|                                     |                |                                                                                     |                                                                                                                                                      |                                                                                         |        |                                             |                                                                                                                               |                                                                                                                                                                                                                                                                                      |                                                                                                                                                                                                                                                                                                                                       |                                                                                                                                                   |
|-------------------------------------|----------------|-------------------------------------------------------------------------------------|------------------------------------------------------------------------------------------------------------------------------------------------------|-----------------------------------------------------------------------------------------|--------|---------------------------------------------|-------------------------------------------------------------------------------------------------------------------------------|--------------------------------------------------------------------------------------------------------------------------------------------------------------------------------------------------------------------------------------------------------------------------------------|---------------------------------------------------------------------------------------------------------------------------------------------------------------------------------------------------------------------------------------------------------------------------------------------------------------------------------------|---------------------------------------------------------------------------------------------------------------------------------------------------|
| <b>Parikh et al. 2021</b>           | United States  | Retrospective description of QI program and outcomes                                | Hospital (1)                                                                                                                                         | Inefficiencies in ambulatory surgery                                                    | Single | Six Sigma (DMAIC)                           | Increase patient satisfaction, improve quality of care, and increase efficiency of patient flow related to ambulatory surgery | <ul style="list-style-type: none"> <li>Better define and optimize staff roles</li> <li>Improve communication between operating room staff</li> </ul>                                                                                                                                 | <ul style="list-style-type: none"> <li>Some (but not all anticipated) improvements to workflow were observed</li> </ul>                                                                                                                                                                                                               | Local: <ul style="list-style-type: none"> <li>Administrators</li> </ul>                                                                           |
| <b>Radwan et al. 2020</b>           | United Kingdom | Retrospective description of QI program and outcomes                                | Primary care (1)                                                                                                                                     | Inequity in the diabetes care and diabetes outcomes                                     | Single | PDSA cycles                                 | Improve measurable diabetes-clinical outcomes in marginalized ethnic communities                                              | <ul style="list-style-type: none"> <li>Information gathering</li> <li>Pharmacist education</li> <li>Process optimization</li> </ul>                                                                                                                                                  | <ul style="list-style-type: none"> <li>Improvements to care processes</li> <li>All treatment targets for patients with diabetes</li> </ul>                                                                                                                                                                                            | Local: <ul style="list-style-type: none"> <li>Managers</li> </ul>                                                                                 |
| <b>Raman et al. 2022</b>            | United States  | Retrospective description of QI program and outcomes                                | Hospital (1) <ul style="list-style-type: none"> <li>Pediatric hospital</li> </ul>                                                                    | Inefficiencies in adolescent scoliosis operations                                       | Single | None described                              | Improve perioperative efficiency in adolescent idiopathic scoliosis                                                           | CUSP (Comprehensive Unit-based Safety Program) <ul style="list-style-type: none"> <li>Increasing visibility of metrics for duration</li> <li>Partnering with blood bank</li> <li>Streamlining OR trays</li> <li>Improving of OR setup and staffing</li> </ul>                        | <ul style="list-style-type: none"> <li>Increase in first case on-time start</li> <li>Variance decrease for anesthesia ready time</li> <li>Decrease in closure to patient out of room time</li> </ul>                                                                                                                                  | Local: <ul style="list-style-type: none"> <li>Senior executives</li> <li>RN managers</li> </ul>                                                   |
| <b>Read Sermersheim et al. 2021</b> | United States  | Retrospective description of QI program and outcomes                                | Hospital (1)                                                                                                                                         | High incidence of hospital acquired injuries related to devices placed around the nares | Single | "RUSH Way" (combines PDCA, Six Sigma, Lean) | Reduce the incidence of nares acquired pressure injuries (NAPIs) to 3%                                                        | Evidence-based nares acquired pressure injuries (NAPIs) preventive care bundle comprising an improved tube fastening system <ul style="list-style-type: none"> <li>hydrocolloid barrier</li> <li>tube securement device</li> <li>patient assessments</li> <li>site checks</li> </ul> | <ul style="list-style-type: none"> <li>Reduction in nares acquired pressure injuries incidence rate</li> </ul>                                                                                                                                                                                                                        | Local: <ul style="list-style-type: none"> <li>Manager from nursing department</li> </ul>                                                          |
| <b>Rocker et al. 2017</b>           | Canada         | Retrospective description of QI program and outcomes and QI implementation measures | Multiple institutions (78) across 10 provinces <ul style="list-style-type: none"> <li>Acute care</li> <li>Primary care</li> <li>Home care</li> </ul> | Suboptimal COPD care and burden of disease for patients and health systems              | Multi  | PDSA cycles                                 | Improve COPD care quality and patient-centeredness                                                                            | INSPIRED COPD Outreach Program: <ul style="list-style-type: none"> <li>Post-discharge follow-up</li> <li>Psychosocial support</li> <li>Access to support services</li> </ul>                                                                                                         | <ul style="list-style-type: none"> <li>Aspects of the QI intervention implemented to varying degrees</li> <li>Many teams involved patients in customized care planning</li> <li>Admissions, emergency room visits and costs decreased in some facilities</li> <li>Teams reported gaining greater knowledge about COPD care</li> </ul> | Regional: <ul style="list-style-type: none"> <li>Not specified</li> </ul> Local: <ul style="list-style-type: none"> <li>Nurse managers</li> </ul> |
| <b>Rubenstein et al. 2010</b>       | United States  | Description of QI program and                                                       | Primary care (3) in three regions                                                                                                                    | Suboptimal quality of depression care                                                   | Multi  | PDSA cycles                                 | Implement research-based collaborative                                                                                        | Translating Initiatives in Depression into Effective Solution (TIDES): <ul style="list-style-type: none"> <li>Pathway</li> </ul>                                                                                                                                                     | <ul style="list-style-type: none"> <li>Decrease in mean Patient Health Questionnaire (PHQ-9) scores</li> </ul>                                                                                                                                                                                                                        | Regional: <ul style="list-style-type: none"> <li>Regional director</li> </ul> Local:                                                              |

|                               |                |                                                                                 |                                                                                                        |                                                                                                                         |        |                   |                                                                                                        |                                                                                                                                                                                                                                                                                   |                                                                                                                                                                                                                                                                                                             |                                                                                                                                                                                                                                                                                                                                   |
|-------------------------------|----------------|---------------------------------------------------------------------------------|--------------------------------------------------------------------------------------------------------|-------------------------------------------------------------------------------------------------------------------------|--------|-------------------|--------------------------------------------------------------------------------------------------------|-----------------------------------------------------------------------------------------------------------------------------------------------------------------------------------------------------------------------------------------------------------------------------------|-------------------------------------------------------------------------------------------------------------------------------------------------------------------------------------------------------------------------------------------------------------------------------------------------------------|-----------------------------------------------------------------------------------------------------------------------------------------------------------------------------------------------------------------------------------------------------------------------------------------------------------------------------------|
|                               |                | intermediate outcomes                                                           |                                                                                                        |                                                                                                                         |        |                   | care for depression                                                                                    | <ul style="list-style-type: none"> <li>• Manager roles</li> <li>• Clinician roles</li> <li>• Informatics</li> <li>• Education</li> </ul>                                                                                                                                          | • Care managers referred 28% of TIDES patients to mental health specialty                                                                                                                                                                                                                                   | • Clinical and administrative leaders                                                                                                                                                                                                                                                                                             |
| <b>Shi et al. 2022</b>        | Taiwan         | Retrospective description of QJ program and outcomes                            | Hospital (1)                                                                                           | Elevated rate of surgical site infections                                                                               | Single | Six Sigma (DMAIC) | Reduce the surgical site rates by 20%                                                                  | <ul style="list-style-type: none"> <li>• Strengthen leadership support system</li> <li>• Perioperative risk assessment</li> <li>• Standardize perioperative protocols</li> <li>• Healthcare information feedback system</li> <li>• Environmental cleaning audit system</li> </ul> | • Decrease in surgical site infections                                                                                                                                                                                                                                                                      | Local: <ul style="list-style-type: none"> <li>• Managers of the general affairs office</li> <li>• Dean and hospital administrators</li> </ul>                                                                                                                                                                                     |
| <b>Taylor et al. 2021</b>     | United Kingdom | Retrospective description of QJ program and outcomes QJ implementation measures | Multiple institutions (10) <ul style="list-style-type: none"> <li>• Integrated Care Centres</li> </ul> | Suboptimal breast cancer care                                                                                           | Multi  | None described    | Improve multi disciplinary team breast cancer care                                                     | Multi Disciplinary Team (MDT) Fit Program: <ul style="list-style-type: none"> <li>• Assessment and feedback programme</li> </ul>                                                                                                                                                  | <ul style="list-style-type: none"> <li>• All teams within the care centers participated in the implementation of MDT-FIT</li> <li>• Moderate fidelity</li> <li>• High acceptability</li> <li>• Moderate adoption</li> <li>• High appropriateness</li> <li>• Low cost</li> <li>• High feasibility</li> </ul> | Regional: <ul style="list-style-type: none"> <li>• Integrated care system (ICS) director</li> </ul> Local: <ul style="list-style-type: none"> <li>• Managers</li> <li>• Administrators</li> </ul>                                                                                                                                 |
| <b>Villarreal et al. 2015</b> | United States  | Retrospective description of QJ program and outcomes                            | Hospital (1) <ul style="list-style-type: none"> <li>• Radiology Department</li> </ul>                  | Delays in procedure start times in radiology                                                                            | Single | None described    | Improve efficiency and reduce delays in radiology start times                                          | <ul style="list-style-type: none"> <li>• Checklist for treatment room handoff</li> <li>• Redefinition of transport responsibility</li> <li>• Timing of blood draw modified</li> <li>• Consent performed by fellows</li> <li>• Lab results made accessible via internet</li> </ul> | <ul style="list-style-type: none"> <li>• Increase in number of on-time starts</li> <li>• Reduction in patient wait times</li> <li>• Reduction in delay duration</li> <li>• Reduction in subsequent patient care delays</li> </ul>                                                                           | Local: <ul style="list-style-type: none"> <li>• Manager</li> <li>• Nurse manager</li> </ul>                                                                                                                                                                                                                                       |
| <b>Waiswa et al. 2021</b>     | Uganda         | Retrospective description of QJ program and outcomes                            | Hospital (6)                                                                                           | High rate of adverse birth outcomes                                                                                     | Multi  | PDSA cycles       | Improve the quality of maternal and neonatal care in hospitals                                         | Standardized package that included: <ul style="list-style-type: none"> <li>• Training</li> <li>• equipment and data collection</li> <li>• clinical mentorship</li> <li>• Support for improved clinical audits</li> <li>• Support for continuous leadership engagement</li> </ul>  | <ul style="list-style-type: none"> <li>• Neonatal Care Units in maternity units institutionalized, as well as kangaroo mother care spaces, resuscitation corners, and MPDRs in the maternity units</li> <li>• Reduction in maternal and neonatal mortality rates</li> </ul>                                 | Regional: <ul style="list-style-type: none"> <li>• Health system managers</li> <li>• District health officers</li> <li>• Minister of Health Obstetricians</li> </ul> Local: <ul style="list-style-type: none"> <li>• Medical superintendents</li> <li>• hospital administrators</li> <li>• Neonatal care unit managers</li> </ul> |
| <b>Welch et al. 2017</b>      | United States  | Retrospective description of QJ program and outcomes                            | Hospital (1)                                                                                           | Burden of medically complex patients in neonatal intensive care units, and diminished collaboration and care continuity | Single | PDSA cycles       | Improve collaboration and continuity of care, decrease length of stay, and improve parent satisfaction | Care Collaboration for Babies with Extended Stays (CBES): <ul style="list-style-type: none"> <li>• Weekly multidisciplinary team meetings to discuss long term plans for patients</li> </ul>                                                                                      | Outcomes <ul style="list-style-type: none"> <li>• Reduction in duration of hospitalization</li> </ul>                                                                                                                                                                                                       | Local: <ul style="list-style-type: none"> <li>• NICU Medical director</li> <li>• NICU Nurse manager</li> </ul>                                                                                                                                                                                                                    |

|                  |              |                                                                                                   |                  |                                               |       |             |                            |                                                                                                                                                                                                                                                                                     |                                                                                                                                                                                                                   |                                                                                                                                                                          |
|------------------|--------------|---------------------------------------------------------------------------------------------------|------------------|-----------------------------------------------|-------|-------------|----------------------------|-------------------------------------------------------------------------------------------------------------------------------------------------------------------------------------------------------------------------------------------------------------------------------------|-------------------------------------------------------------------------------------------------------------------------------------------------------------------------------------------------------------------|--------------------------------------------------------------------------------------------------------------------------------------------------------------------------|
| Yapa et al. 2019 | South Africa | Retrospective description of QI processes and outcomes and factors associated with implementation | Primary care (7) | High rate of mother-to-child HIV transmission | Multi | PDSA cycles | Improve Antenatal HIV care | MONARCH (Management and Optimisation of Nutrition, Antenatal, Reproductive, Child health and HIV care):<br><ul style="list-style-type: none"> <li>• Viral load monitoring among pregnant women living with HIV</li> <li>• Repeat testing among women not living with HIV</li> </ul> | <ul style="list-style-type: none"> <li>• CQI not fully implemented and normalized</li> <li>• Patient tracking notebook and results filing system implemented</li> <li>• Viral load monitoring improved</li> </ul> | Regional:<br><ul style="list-style-type: none"> <li>• Not specified</li> </ul> Local:<br><ul style="list-style-type: none"> <li>• Clinic operational managers</li> </ul> |
|------------------|--------------|---------------------------------------------------------------------------------------------------|------------------|-----------------------------------------------|-------|-------------|----------------------------|-------------------------------------------------------------------------------------------------------------------------------------------------------------------------------------------------------------------------------------------------------------------------------------|-------------------------------------------------------------------------------------------------------------------------------------------------------------------------------------------------------------------|--------------------------------------------------------------------------------------------------------------------------------------------------------------------------|

**Table 2. The roles decision-makers played in the QI projects (expanded)**

| Authors               | QI project Initiator                                                                                                      | Local QI project leader(s)                                                     | Decision-maker level | Decision-maker role                                                                                   | Decision-makers' documented contributions                                                                                                                                                                                                                                                               | Observed benefits of decision-maker involvement                                                                                                                                                                                                                                         | Observed challenges with decision-maker involvement                                                                                                                                             |
|-----------------------|---------------------------------------------------------------------------------------------------------------------------|--------------------------------------------------------------------------------|----------------------|-------------------------------------------------------------------------------------------------------|---------------------------------------------------------------------------------------------------------------------------------------------------------------------------------------------------------------------------------------------------------------------------------------------------------|-----------------------------------------------------------------------------------------------------------------------------------------------------------------------------------------------------------------------------------------------------------------------------------------|-------------------------------------------------------------------------------------------------------------------------------------------------------------------------------------------------|
| Arbour et al. 2021    | Non-government organization<br>• Center for the Study of Social Policy (CSSP)                                             | Local QI team                                                                  | Regional             | Insufficient detail                                                                                   | Not specified                                                                                                                                                                                                                                                                                           | None described                                                                                                                                                                                                                                                                          | None described                                                                                                                                                                                  |
|                       |                                                                                                                           |                                                                                | Local                | Collaborator                                                                                          | Clinic administrator:<br>• Member of local implementation team                                                                                                                                                                                                                                          |                                                                                                                                                                                                                                                                                         |                                                                                                                                                                                                 |
| Brush et al. 2006     | Local actor(s)<br>• Data committee<br>• Quality committee                                                                 | Local QI team<br>• Data committee<br>• Quality committee                       | Local                | Collaborator                                                                                          | Administrators:<br>• Member of Data Committee and Quality Committee<br>• Responsibilities included launching, coordinating, and institutionalizing QI methods<br>• Quality committee initiated and led the project.                                                                                     | <ul style="list-style-type: none"> <li>• Collaboration with decision-makers promoted a sustained spirit of cooperation</li> <li>• Collaboration supported shared learning, leadership and problem solving</li> <li>• Decision-maker involvement helped gain physician buy-in</li> </ul> | None described                                                                                                                                                                                  |
| Chowdhury et al. 2020 | Not specified                                                                                                             | Local Decision-Maker<br>• Team manager                                         | Local                | Collaborator                                                                                          | Team manager, deputy manager, and team administrative manager:<br>• Weekly meetings to brainstorm ideas, plan tests of change, review progress and define courses of action<br>• The team measured baseline data, established the design and theory change and participated in PDSA cycles.             | None described                                                                                                                                                                                                                                                                          | None described                                                                                                                                                                                  |
| Davies et al. 2019    | Not specified                                                                                                             | Local QI team<br>• Nursing division staff                                      | Local                | Hospital CEO<br>• Supporter<br>• Consultant<br><br>Director of Nursing<br>• Supporter<br>• Consultant | Hospital CEO<br>• Project sponsor<br>• Consulted for defining the strategy<br><br>Director of Nursing<br>• Project champion<br>• Consulted for defining the strategy                                                                                                                                    | <ul style="list-style-type: none"> <li>• Senior management involvement and financial investment considered crucial</li> </ul>                                                                                                                                                           | None described                                                                                                                                                                                  |
| Doherty et al. 2009   | Regional team (including regional decision-makers)<br>• Programme managers<br><br>• Unit managers<br>• Clinic supervisors | Regional QI teams<br>• District and sub-district coordinators<br>• Supervisors | Regional             | Collaborator                                                                                          | District programme managers<br>• Participated in the assessment phase task team<br>• Participated in training workshops and feedback sessions<br>• Gained skills in programme assessment<br>• Helped identify gaps and define goals and action plans<br>• Participated in implementation and monitoring | <ul style="list-style-type: none"> <li>• Participatory approach enabled mid level managers to see how their facilities functioned and take ownership</li> </ul>                                                                                                                         | <ul style="list-style-type: none"> <li>• Support from senior district management critical to enabling middle management participation</li> </ul>                                                |
|                       |                                                                                                                           |                                                                                | Local                | Collaborator                                                                                          | Unit managers and clinic supervisors<br>• Participated in the assessment phase task team<br>• Participated in training workshops and feedback sessions<br>• Helped identify gaps and define goals and action plans<br>• Participated in implementation and monitoring                                   |                                                                                                                                                                                                                                                                                         |                                                                                                                                                                                                 |
| Gage et al. 2022      | Regional decision-maker<br>• Ministry of Health and Child Care                                                            | Local QI team<br>• CQI teams                                                   | Regional             | Ministry of Health and Child Care<br>• Initiator<br><br>District managers<br>• Supporter              | Ministry of Health and Child Care<br>• Initiated the national program which comprised the QI pilot<br>• Made QI a priority<br><br>District managers                                                                                                                                                     | <ul style="list-style-type: none"> <li>• Leadership, teamwork and joint decision-making considered enabling factors</li> <li>• Supportive supervision from district authority was considered motivating</li> </ul>                                                                      | <ul style="list-style-type: none"> <li>• Some participants viewed the QI project as a top-down intervention</li> <li>• Quality of supervision and mentoring varied between districts</li> </ul> |

|                     |                                                                                                                                                                                                                        |                                                                                                                      |          |                                                                                                                                                                     |                                                                                                                                                                                                                                                                                                                                                                                                                                                                                                                                                                                 |                                                                                                                                                                                                        |                                                                                                                                                                       |
|---------------------|------------------------------------------------------------------------------------------------------------------------------------------------------------------------------------------------------------------------|----------------------------------------------------------------------------------------------------------------------|----------|---------------------------------------------------------------------------------------------------------------------------------------------------------------------|---------------------------------------------------------------------------------------------------------------------------------------------------------------------------------------------------------------------------------------------------------------------------------------------------------------------------------------------------------------------------------------------------------------------------------------------------------------------------------------------------------------------------------------------------------------------------------|--------------------------------------------------------------------------------------------------------------------------------------------------------------------------------------------------------|-----------------------------------------------------------------------------------------------------------------------------------------------------------------------|
|                     |                                                                                                                                                                                                                        |                                                                                                                      |          |                                                                                                                                                                     | <ul style="list-style-type: none"> <li>• Trained and supported to implement QI</li> </ul>                                                                                                                                                                                                                                                                                                                                                                                                                                                                                       |                                                                                                                                                                                                        | <ul style="list-style-type: none"> <li>• National QI projects require strategies at all levels (macro, meso and micro)</li> </ul>                                     |
| Gerrish et al. 2018 | Non-government organization <ul style="list-style-type: none"> <li>• Teaching Hospitals and healthcare partners</li> </ul>                                                                                             | Local QI team <ul style="list-style-type: none"> <li>• Nurse</li> <li>• Facilitators</li> </ul>                      | Local    | Collaborator                                                                                                                                                        | Managers <ul style="list-style-type: none"> <li>• Received coaching to carry out QI activities</li> <li>• Led the program within each of the facilities</li> <li>• Consulted and engaged staff in identifying factors, monitoring results, and decision making</li> </ul>                                                                                                                                                                                                                                                                                                       | None described                                                                                                                                                                                         | None described                                                                                                                                                        |
|                     |                                                                                                                                                                                                                        |                                                                                                                      | Regional | Insufficient detail                                                                                                                                                 | Not specified                                                                                                                                                                                                                                                                                                                                                                                                                                                                                                                                                                   |                                                                                                                                                                                                        |                                                                                                                                                                       |
| Haraden et al. 2011 | Regional decision-maker <ul style="list-style-type: none"> <li>• Government health directorate</li> </ul>                                                                                                              | Local decision-maker <ul style="list-style-type: none"> <li>• Program manager</li> <li>• Executive leader</li> </ul> | Local    | Collaborator                                                                                                                                                        | Clinical managers <ul style="list-style-type: none"> <li>• Involved in meso level group for the change initiation phase</li> <li>• Involved in macro level group for the achieving change phase</li> </ul> Service managers <ul style="list-style-type: none"> <li>• Involved in macro level group for the achieving change phase</li> </ul>                                                                                                                                                                                                                                    | <ul style="list-style-type: none"> <li>• Leadership involvement considered key to clinician buy-in and local initiatives being adequately supported</li> </ul>                                         | None described                                                                                                                                                        |
|                     |                                                                                                                                                                                                                        |                                                                                                                      | Regional | Local health boards <ul style="list-style-type: none"> <li>• Supporter</li> </ul> Scottish government <ul style="list-style-type: none"> <li>• Initiator</li> </ul> | Local health boards <ul style="list-style-type: none"> <li>• Recruited to get clinician buy-in.</li> <li>• Participated in leadership walk-arounds</li> </ul> Scottish government <ul style="list-style-type: none"> <li>• Worked with IHI on a measurement plan to gather data for run charts</li> </ul>                                                                                                                                                                                                                                                                       |                                                                                                                                                                                                        |                                                                                                                                                                       |
| Hill et al. 2015    | Not specified                                                                                                                                                                                                          | Local QI team <ul style="list-style-type: none"> <li>• Project team</li> </ul>                                       | Local    | Collaborator                                                                                                                                                        | Managers <ul style="list-style-type: none"> <li>• Received QI training alongside leaders and clinicians</li> <li>• Collaborated with government on aligning goals</li> <li>• Led local QI projects</li> </ul>                                                                                                                                                                                                                                                                                                                                                                   | None described                                                                                                                                                                                         | None described                                                                                                                                                        |
|                     |                                                                                                                                                                                                                        |                                                                                                                      | Regional | Local health boards <ul style="list-style-type: none"> <li>• Supporter</li> </ul> Scottish government <ul style="list-style-type: none"> <li>• Initiator</li> </ul> | Local health boards <ul style="list-style-type: none"> <li>• Recruited to get clinician buy-in.</li> <li>• Participated in leadership walk-arounds</li> </ul> Scottish government <ul style="list-style-type: none"> <li>• Worked with IHI on a measurement plan to gather data for run charts</li> </ul>                                                                                                                                                                                                                                                                       |                                                                                                                                                                                                        |                                                                                                                                                                       |
| Iyengar et al. 2014 | Regional team (including regional decision-makers) <ul style="list-style-type: none"> <li>• State Government</li> <li>• Action Research &amp; Training for Health</li> <li>• United Nations Population Fund</li> </ul> | Not specified                                                                                                        | Local    | Collaborator                                                                                                                                                        | Nursing director <ul style="list-style-type: none"> <li>• Member of QI team</li> <li>• The team established the goals, collected and interpreted data, identified and implemented strategies</li> </ul>                                                                                                                                                                                                                                                                                                                                                                         | <ul style="list-style-type: none"> <li>• Close collaboration with state and district level decision makers from the design stage considered crucial to building consensus and sustaining QI</li> </ul> | <ul style="list-style-type: none"> <li>• Better monitoring by district authority would have better supported practice change</li> </ul>                               |
|                     |                                                                                                                                                                                                                        |                                                                                                                      | Regional | <ul style="list-style-type: none"> <li>• Initiator</li> <li>• Supporter</li> </ul>                                                                                  | State Government Medical, Health & Family Welfare Department <ul style="list-style-type: none"> <li>• Collaborated with partners on identifying facilities and developing the initiative</li> <li>• Sent letters of invitation to participating facilities</li> <li>• Participated in workshops on the role of evidence based care</li> </ul> District health officers and State Managers <ul style="list-style-type: none"> <li>• Received report cards and attended annual review meetings</li> <li>• Participated in workshops on the role of evidence based care</li> </ul> |                                                                                                                                                                                                        |                                                                                                                                                                       |
| Jaribu et al. 2015  | Regional decision-maker <ul style="list-style-type: none"> <li>• Ministry of health Health, and Social Welfare</li> <li>• Mtwara Rural and Ruangwa Council Health</li> </ul>                                           | QI Facilitator                                                                                                       | Local    | Collaborator                                                                                                                                                        | District managers <ul style="list-style-type: none"> <li>• Participated in QI workshops</li> <li>• Included as "collaborators"</li> </ul>                                                                                                                                                                                                                                                                                                                                                                                                                                       | None described                                                                                                                                                                                         | <ul style="list-style-type: none"> <li>• Directives from district managers and local managers' limited influence hindered acceptability and sustainability</li> </ul> |
|                     |                                                                                                                                                                                                                        |                                                                                                                      | Regional | Insufficient detail                                                                                                                                                 | Not specified                                                                                                                                                                                                                                                                                                                                                                                                                                                                                                                                                                   |                                                                                                                                                                                                        |                                                                                                                                                                       |



|                            |                                                                                                                                                                                                  |                                                                                          |          |                                                                                                                                                                                                  |                                                                                                                                                                                                                                                                                                                                                                                                                                                                                                                                                                                                                                                                                                                                                                                                                                                                                                  |                                                                                                                                                                                                                                                                                                                                                                                                  |                                                                                                                                                                                                              |
|----------------------------|--------------------------------------------------------------------------------------------------------------------------------------------------------------------------------------------------|------------------------------------------------------------------------------------------|----------|--------------------------------------------------------------------------------------------------------------------------------------------------------------------------------------------------|--------------------------------------------------------------------------------------------------------------------------------------------------------------------------------------------------------------------------------------------------------------------------------------------------------------------------------------------------------------------------------------------------------------------------------------------------------------------------------------------------------------------------------------------------------------------------------------------------------------------------------------------------------------------------------------------------------------------------------------------------------------------------------------------------------------------------------------------------------------------------------------------------|--------------------------------------------------------------------------------------------------------------------------------------------------------------------------------------------------------------------------------------------------------------------------------------------------------------------------------------------------------------------------------------------------|--------------------------------------------------------------------------------------------------------------------------------------------------------------------------------------------------------------|
|                            | Management Teams (CHMT) <ul style="list-style-type: none"> <li>Ifakara Health Institute (IHI) staff</li> <li>Improving New-born Survival in Southern Tanzania (INSIST) team</li> </ul>           |                                                                                          |          |                                                                                                                                                                                                  |                                                                                                                                                                                                                                                                                                                                                                                                                                                                                                                                                                                                                                                                                                                                                                                                                                                                                                  |                                                                                                                                                                                                                                                                                                                                                                                                  | <ul style="list-style-type: none"> <li>District managers must support local managers prioritize QI</li> <li>District managers received external support for 18 months then support was withdrawn</li> </ul>  |
| <b>Magge et al. 2019</b>   | Regional decision-maker <ul style="list-style-type: none"> <li>Ministry of Health</li> <li>Institute for Healthcare Improvement (IHI)</li> </ul>                                                 | Local QI team <ul style="list-style-type: none"> <li>Multi disciplinary teams</li> </ul> | Regional | Initiator                                                                                                                                                                                        | Federal Ministry of Health <ul style="list-style-type: none"> <li>Partnered with the Institute for Healthcare Improvement (IHI) to identify opportunities for improvement</li> <li>Consulted regarding the selection of five prototype collaboratives</li> <li>Initiated and planned the initiative at the national level</li> </ul>                                                                                                                                                                                                                                                                                                                                                                                                                                                                                                                                                             | <ul style="list-style-type: none"> <li>The Minister of Health's leadership in the design and implementation was considered a major enabling factor</li> <li>Ministry of health investment and incorporation of the QI strategy into central policy considered key</li> <li>Learning sessions helped link health system actors with community members to advance patient-centered care</li> </ul> | None described                                                                                                                                                                                               |
|                            |                                                                                                                                                                                                  |                                                                                          | Local    | Collaborator                                                                                                                                                                                     | Facility managers <ul style="list-style-type: none"> <li>Served as members on each of the collaboratives' multidisciplinary teams</li> <li>Assisted with the development of action plans to address gaps including clinical training</li> </ul>                                                                                                                                                                                                                                                                                                                                                                                                                                                                                                                                                                                                                                                  |                                                                                                                                                                                                                                                                                                                                                                                                  |                                                                                                                                                                                                              |
| <b>Mahomed et al. 2017</b> | Researchers                                                                                                                                                                                      | Researchers                                                                              | Regional | Supporter                                                                                                                                                                                        | Department of Health Provincial Infection Prevention and Control Unit and senior management <ul style="list-style-type: none"> <li>Provided support to the ICUs in their conduct of QI</li> </ul>                                                                                                                                                                                                                                                                                                                                                                                                                                                                                                                                                                                                                                                                                                | None described                                                                                                                                                                                                                                                                                                                                                                                   | <ul style="list-style-type: none"> <li>Local managers did not take ownership of the process nor maintain adequate oversight</li> <li>Nursing managers were often occupied with their other duties</li> </ul> |
|                            |                                                                                                                                                                                                  |                                                                                          | Local    | Senior management, clinical manager <ul style="list-style-type: none"> <li>Consultant</li> </ul> Nursing manager <ul style="list-style-type: none"> <li>Consultant</li> <li>Supporter</li> </ul> | <p>Senior management</p> <ul style="list-style-type: none"> <li>Consulted for planning</li> <li>Participated in review meeting to decide if the surveillance system should be adopted</li> </ul> <p>Nursing manager</p> <ul style="list-style-type: none"> <li>Consulted for planning</li> <li>Approved the tool prior to implementation</li> <li>Provided feedback from evaluation of the surveillance system</li> <li>Participated in review meeting to decide if the surveillance system should be adopted</li> <li>Ensured the night staff received training</li> </ul> <p>Clinical manager</p> <ul style="list-style-type: none"> <li>Consulted for planning</li> <li>Met with principle investigator to review patient charts</li> <li>Approved the tool prior to implementation</li> <li>Participated in review meeting to decide if the surveillance system should be adopted</li> </ul> |                                                                                                                                                                                                                                                                                                                                                                                                  |                                                                                                                                                                                                              |
| <b>Mate et al. 2013</b>    | Regional decision-maker <ul style="list-style-type: none"> <li>South Africa National Department of Health</li> <li>Prevention of mother-to child HIV transmission (PMTCT) Directorate</li> </ul> | Project leader                                                                           | Regional | National Department of Health <ul style="list-style-type: none"> <li>Initiator</li> </ul> District managers <ul style="list-style-type: none"> <li>Supporter</li> </ul>                          | National Department of Health <ul style="list-style-type: none"> <li>Initiated the national strategy</li> </ul> District managers <ul style="list-style-type: none"> <li>Designated NGOs to participate</li> <li>Planned the QI project</li> <li>Participated in monthly district review meetings</li> </ul>                                                                                                                                                                                                                                                                                                                                                                                                                                                                                                                                                                                     | <ul style="list-style-type: none"> <li>District managers' involvement at early stages and project leadership considered key success factors</li> <li>Ownership by National department of health leaders was considered essential</li> </ul>                                                                                                                                                      | None explicitly discussed                                                                                                                                                                                    |
|                            |                                                                                                                                                                                                  |                                                                                          | Local    | Insufficient detail                                                                                                                                                                              | Facility managers <ul style="list-style-type: none"> <li>Involved in local execution of the QI project</li> </ul>                                                                                                                                                                                                                                                                                                                                                                                                                                                                                                                                                                                                                                                                                                                                                                                |                                                                                                                                                                                                                                                                                                                                                                                                  |                                                                                                                                                                                                              |

|                                     |                                                                                                                              |                                                                |          |                                                                                             |                                                                                                                                                                                                                                                                                                                                                                                                                                                   |                                                                                                                                          |                                                                                                                                                                               |
|-------------------------------------|------------------------------------------------------------------------------------------------------------------------------|----------------------------------------------------------------|----------|---------------------------------------------------------------------------------------------|---------------------------------------------------------------------------------------------------------------------------------------------------------------------------------------------------------------------------------------------------------------------------------------------------------------------------------------------------------------------------------------------------------------------------------------------------|------------------------------------------------------------------------------------------------------------------------------------------|-------------------------------------------------------------------------------------------------------------------------------------------------------------------------------|
| <b>Meehan et al. 2015</b>           | Non-government organization<br>• Connecticut Quality Improvement Organization                                                | QI Facilitators                                                | Regional | Insufficient detail                                                                         | Not described                                                                                                                                                                                                                                                                                                                                                                                                                                     | None explicitly discussed                                                                                                                | • Many leaders approached declined to participate due to lack of time                                                                                                         |
|                                     |                                                                                                                              |                                                                | Local    | Supporter                                                                                   | Administrators and nursing managers<br>• Asked to give their support<br>• Some attended QI training sessions<br>• Offered technical assistance                                                                                                                                                                                                                                                                                                    |                                                                                                                                          |                                                                                                                                                                               |
| <b>Needleman et al. 2016</b>        | Non-government organization<br>• Robert Wood Johnson Foundation (RWJF)<br>• American Organization of Nurse Executives (AONE) | Local QI team<br>• Nursing unit                                | Regional | Insufficient detail                                                                         | Not described                                                                                                                                                                                                                                                                                                                                                                                                                                     | None explicitly discussed                                                                                                                | • Leaders were encouraged to create hospital level teams to support QI teams, but they did in less than a third of sites                                                      |
|                                     |                                                                                                                              |                                                                | Local    | Unit managers<br>• Collaborator<br><br>Other decision-makers<br>• Collaborator (some sites) | Unit managers<br>• Attended or led the regular meetings<br>• Some were also members of a leadership team that discussed reports from unit managers, tests of change and sustainability<br><br>Nursing administrators, physician administrators, department heads<br>• Participated in hospital level teams (some sites)<br>• Member of leadership team that discussed reports from unit managers, tests of change and sustainability (some sites) |                                                                                                                                          |                                                                                                                                                                               |
| <b>Nyström et al. 2018</b>          | Regional team (including regional decision-makers)<br>• Researchers<br>• Public health agency                                | Local decision-maker<br>• Division managers<br>• Unit managers | Regional | Collaborator                                                                                | Division managers<br>• Participated in meetings and workshops<br>• Responsible for overseeing change and aiding staff with implementation                                                                                                                                                                                                                                                                                                         | • Strategic management involvement, coaching, and working with managerial colleagues enhanced the observed change and learning processes | • Managers could have benefited from guidance regarding micro-strategies<br>• When involvement of division managers decreased, progress slowed                                |
|                                     |                                                                                                                              |                                                                | Local    | Collaborator                                                                                | Unit managers<br>• Participated in meetings and workshops<br>• Locally responsible for overseeing change and aiding staff with implementation                                                                                                                                                                                                                                                                                                     |                                                                                                                                          |                                                                                                                                                                               |
| <b>Parikh et al. 2021</b>           | Not specified                                                                                                                | Local decision-maker<br>• Administrators                       | Local    | Collaborator                                                                                | Administrators<br>• Member of the leadership team                                                                                                                                                                                                                                                                                                                                                                                                 | • Leadership involving each stakeholder considered success factor                                                                        | • Lack of continuous reinforcement contributed to resistance and slowed progress<br>• Participation issues, inefficient communication, and insufficient organizational buy-in |
| <b>Radwan et al. 2020</b>           | Regional decision-maker<br>• National Health Service                                                                         | Local QI team<br>• Multi-disciplinary teams                    | Local    | Collaborator                                                                                | Managers<br>• Co-designed interventions<br>• Participated in QI training program<br>• Member of the implementation team<br>• Facilitated recalls and reviews to be undertaken by clinical staff                                                                                                                                                                                                                                                   | • Managers and staff played a role, giving the whole team a sense of ownership                                                           | None explicitly discussed                                                                                                                                                     |
| <b>Raman et al. 2022</b>            | Local actor(s)<br>• Attending surgeon                                                                                        | QI Facilitator                                                 | Local    | Collaborator                                                                                | Senior executives and nurse managers<br>• Provided training<br>• Attended regular meetings<br>• Assisted with the alignment of goals, assessment of needs and development of interventions                                                                                                                                                                                                                                                        | None explicitly discussed                                                                                                                | None explicitly described                                                                                                                                                     |
| <b>Read Sermersheim et al. 2021</b> | Local actor(s)<br>• QI team                                                                                                  | Local QI team                                                  | Local    | Collaborator                                                                                | Nursing manager<br>• Member of the QI team<br>• Co-designed the project charter and plan<br>• Participated in practice evaluation and identification of gaps                                                                                                                                                                                                                                                                                      | None explicitly discussed                                                                                                                | None explicitly described                                                                                                                                                     |

|                               |                                                                                                                     |                                                                                                                                                                             |          |                                                                                                                                                                                                    |                                                                                                                                                                                                                                                                                                                                            |                                                                                                                                                                                                                                  |                                                                                                                                                                                                                                                                                                                                  |
|-------------------------------|---------------------------------------------------------------------------------------------------------------------|-----------------------------------------------------------------------------------------------------------------------------------------------------------------------------|----------|----------------------------------------------------------------------------------------------------------------------------------------------------------------------------------------------------|--------------------------------------------------------------------------------------------------------------------------------------------------------------------------------------------------------------------------------------------------------------------------------------------------------------------------------------------|----------------------------------------------------------------------------------------------------------------------------------------------------------------------------------------------------------------------------------|----------------------------------------------------------------------------------------------------------------------------------------------------------------------------------------------------------------------------------------------------------------------------------------------------------------------------------|
|                               |                                                                                                                     |                                                                                                                                                                             |          |                                                                                                                                                                                                    | <ul style="list-style-type: none"> <li>Helped ensure that education was institutionalized</li> </ul>                                                                                                                                                                                                                                       |                                                                                                                                                                                                                                  |                                                                                                                                                                                                                                                                                                                                  |
| <b>Rocker et al. 2017</b>     | Non-government organization <ul style="list-style-type: none"> <li>Foundation for Healthcare Improvement</li> </ul> | Local QI team <ul style="list-style-type: none"> <li>QI team</li> <li>Foundation for Healthcare Improvement</li> </ul>                                                      | Regional | Insufficient detail                                                                                                                                                                                | Not specified                                                                                                                                                                                                                                                                                                                              | None explicitly discussed                                                                                                                                                                                                        | <ul style="list-style-type: none"> <li>Lack of experience and training hindered optimal facilitation and implementation of program components</li> <li>Benefits of the collaborative not fully realized due to minimal communication between leadership and partner organizations</li> </ul>                                     |
|                               |                                                                                                                     |                                                                                                                                                                             | Local    | Collaborator                                                                                                                                                                                       | Nurse managers <ul style="list-style-type: none"> <li>Members of local QI teams</li> </ul>                                                                                                                                                                                                                                                 |                                                                                                                                                                                                                                  |                                                                                                                                                                                                                                                                                                                                  |
| <b>Rubenstein et al. 2010</b> | Researchers                                                                                                         | Researchers                                                                                                                                                                 | Regional | Collaborator                                                                                                                                                                                       | Regional director <ul style="list-style-type: none"> <li>Endorsed the project</li> <li>Reviewed collaborative care literature provided by the research team</li> <li>Participated in the design of the intervention as member of design panel</li> <li>Participated in PDSA cycles</li> </ul>                                              | <ul style="list-style-type: none"> <li>Support from primary care and mental health leadership at all levels considered critical</li> <li>Buy-in from managers responsible for resource allocation considered critical</li> </ul> | <ul style="list-style-type: none"> <li>Leadership involvement did not persist</li> </ul>                                                                                                                                                                                                                                         |
|                               |                                                                                                                     |                                                                                                                                                                             | Local    | Collaborator                                                                                                                                                                                       | Clinical and administrative leaders <ul style="list-style-type: none"> <li>Implemented the interventions</li> <li>Participated in PDSA cycles</li> </ul>                                                                                                                                                                                   |                                                                                                                                                                                                                                  |                                                                                                                                                                                                                                                                                                                                  |
| <b>Shi et al. 2022</b>        | Local actor(s) <ul style="list-style-type: none"> <li>QI team</li> </ul>                                            | Local QI team                                                                                                                                                               | Local    | Managers at the general affairs office <ul style="list-style-type: none"> <li>Collaborator</li> </ul> Dean and hospital administrators <ul style="list-style-type: none"> <li>Supporter</li> </ul> | Managers at the general affairs office <ul style="list-style-type: none"> <li>Member of the QI team</li> </ul> Dean and hospital administrators <ul style="list-style-type: none"> <li>Approved and enforced the policies and improvement processes</li> <li>Supported implementation</li> <li>Provided the necessary resources</li> </ul> | None explicitly discussed                                                                                                                                                                                                        | None explicitly described                                                                                                                                                                                                                                                                                                        |
| <b>Taylor et al. 2021</b>     | Regional decision-makers <ul style="list-style-type: none"> <li>Integrated care system (ICS) management</li> </ul>  | Local decision-maker <ul style="list-style-type: none"> <li>Integrated care system (ICS) administrator</li> <li>Cancer managers</li> <li>Hospital administrators</li> </ul> | Regional | <ul style="list-style-type: none"> <li>Initiator</li> <li>Supporter</li> </ul>                                                                                                                     | Integrated care system (ICS) administrator <ul style="list-style-type: none"> <li>Coordinated hospital cancer managers and administrators</li> <li>Introduced the program to local teams</li> <li>Received weekly updates from the teams</li> </ul>                                                                                        | None explicitly discussed                                                                                                                                                                                                        | <ul style="list-style-type: none"> <li>Poor stakeholder relationships resulted in a more centralized approach to implementation</li> <li>Centralized approach hindered a sense of ownership</li> <li>The choice by the ICS not to engage hospital based managers and administrators led to a staggered implementation</li> </ul> |
|                               |                                                                                                                     |                                                                                                                                                                             | Local    | <ul style="list-style-type: none"> <li>Initiator</li> <li>Supporter</li> </ul>                                                                                                                     | Managers and administrators <ul style="list-style-type: none"> <li>Introduced the program</li> <li>Identified project champions</li> <li>Received weekly updates</li> </ul>                                                                                                                                                                |                                                                                                                                                                                                                                  |                                                                                                                                                                                                                                                                                                                                  |
| <b>Villarreal et al. 2015</b> | Local actor(s) <ul style="list-style-type: none"> <li>Radiology department</li> </ul>                               | QI Facilitator <ul style="list-style-type: none"> <li>Vice chair of quality</li> </ul>                                                                                      | Local    | Collaborator                                                                                                                                                                                       | Manager and nurse manager <ul style="list-style-type: none"> <li>Member of the QI team</li> <li>Participated in mapping patient workflow and defining metrics</li> <li>Planned and implemented interventions</li> </ul>                                                                                                                    | <ul style="list-style-type: none"> <li>Interdisciplinary multi-level approach provided complimentary insight and supported buy-in at different levels</li> </ul>                                                                 | None explicitly discussed                                                                                                                                                                                                                                                                                                        |
| <b>Waiswa et al. 2021</b>     | Non-government organization <ul style="list-style-type: none"> <li>The World Health Organization (WHO)</li> </ul>   | Local QI team <ul style="list-style-type: none"> <li>Hospital teams led by maternity nurse in charge</li> </ul>                                                             | Regional | Collaborator                                                                                                                                                                                       | Health system managers, District health officers, Minister of Health Obstetricians <ul style="list-style-type: none"> <li>Participated in health system managers meetings</li> <li>Co-designed the intervention</li> </ul>                                                                                                                 | <ul style="list-style-type: none"> <li>Collaboration between facilities helped establish a regional care network</li> </ul>                                                                                                      | None explicitly discussed                                                                                                                                                                                                                                                                                                        |

|                          |                                                                                                                                                                       |                 |          |                                                                                                                                                                             |                                                                                                                                                                                                                                                                                                                                                                                                                    |                                                                                                                                                                                                                                                    |                                                                                                                                                            |
|--------------------------|-----------------------------------------------------------------------------------------------------------------------------------------------------------------------|-----------------|----------|-----------------------------------------------------------------------------------------------------------------------------------------------------------------------------|--------------------------------------------------------------------------------------------------------------------------------------------------------------------------------------------------------------------------------------------------------------------------------------------------------------------------------------------------------------------------------------------------------------------|----------------------------------------------------------------------------------------------------------------------------------------------------------------------------------------------------------------------------------------------------|------------------------------------------------------------------------------------------------------------------------------------------------------------|
|                          |                                                                                                                                                                       |                 |          |                                                                                                                                                                             | <ul style="list-style-type: none"> <li>Reviewed findings from baseline survey and identified priority interventions for implementation</li> <li>Participated in the development, implementation, and evaluation of the project interventions</li> </ul>                                                                                                                                                            | <ul style="list-style-type: none"> <li>Involvement of managers helped ensure feasibility as they knew what would work in their facilities</li> <li>Managers' endorsement of interventions helped ensure their successful implementation</li> </ul> |                                                                                                                                                            |
|                          |                                                                                                                                                                       |                 | Local    | Collaborator                                                                                                                                                                | Medical superintendents, hospital administrators, unit managers <ul style="list-style-type: none"> <li>Participated in health system managers meetings</li> <li>Co-designed the intervention</li> <li>Reviewed findings from baseline survey and identified priority interventions for implementation</li> <li>Assisted with the implementation</li> </ul>                                                         |                                                                                                                                                                                                                                                    |                                                                                                                                                            |
| <b>Welch et al. 2017</b> | Local actor(s) <ul style="list-style-type: none"> <li>Clinician researchers</li> </ul>                                                                                | Local QI team   | Local    | Medical director of the NICU <ul style="list-style-type: none"> <li>Consultant</li> </ul> NICU nurse manager <ul style="list-style-type: none"> <li>Collaborator</li> </ul> | Medical director of the NICU <ul style="list-style-type: none"> <li>Consulted on the intervention and primary outcomes</li> </ul> NICU nurse manager <ul style="list-style-type: none"> <li>Participated in multidisciplinary team meetings (clinical and QI)</li> <li>Collaborated on the development of the intervention</li> <li>Discussed interim results and planned and implemented modifications</li> </ul> | None explicitly discussed                                                                                                                                                                                                                          | <ul style="list-style-type: none"> <li>QI team's decisions can conflict with manager's plans</li> </ul>                                                    |
| <b>Yapa et al. 2019</b>  | Non-government organizations <ul style="list-style-type: none"> <li>NHS foundation trust</li> <li>Clinicians</li> <li>Researchers</li> <li>QI facilitators</li> </ul> | QI Facilitators | Regional | Insufficient detail                                                                                                                                                         | Not specified                                                                                                                                                                                                                                                                                                                                                                                                      | <ul style="list-style-type: none"> <li>Involvement of the operational manager considered essential for authorizing activity</li> </ul>                                                                                                             | <ul style="list-style-type: none"> <li>Time commitments limited operational manager involvement and subsequently delayed improvement activities</li> </ul> |
|                          |                                                                                                                                                                       |                 | Local    | Collaborator                                                                                                                                                                | Clinic operational managers <ul style="list-style-type: none"> <li>Guided clinic teams within each facility to identify areas for improvement and test solutions</li> <li>Attended CQI team meetings in some settings</li> </ul>                                                                                                                                                                                   |                                                                                                                                                                                                                                                    |                                                                                                                                                            |
